# Supplementary material
Source: PubMed Central journal article supplement (PMC4375341)
Supplement: AEM.04038-14_zam999116172so1.pdf [file AEM.04038-14_zam999116172so1.pdf]

Figure S1. Phylogenetic tree comparing *c*-type cytochrome proteins from *Ferroglobus placidus* to *c*-type cytochromes from other bacterial and archaeal species.

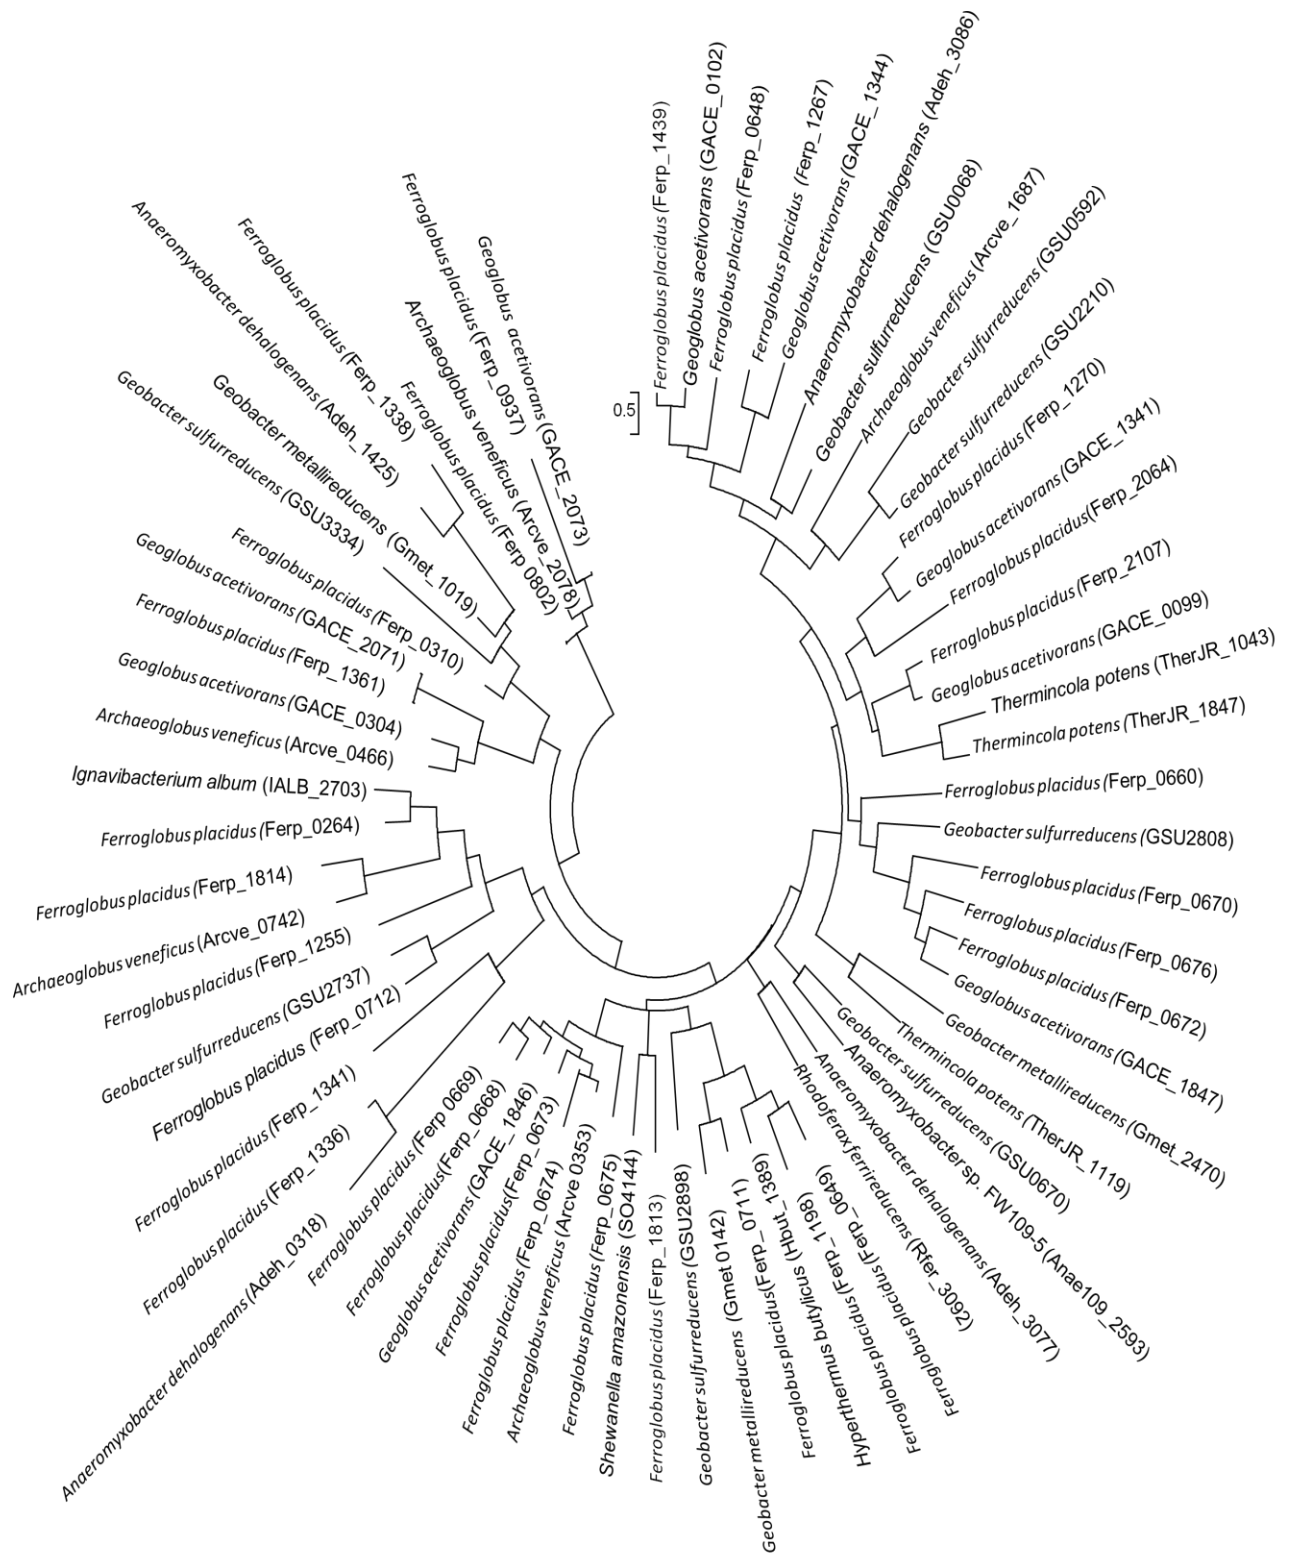

Figure S2. “Alternative complex III” operons found in *Ferroglobus placidus* (locus id: Ferp), *Geobacter bemidjiensis* (Gbem), *G. metallireducens* (Gmet), *G. daltonii* (Geob), *G. sulfurreducens* (GSU), *G. uraniireducens* (Gura), *G. bremsensis* (K419DRAFT), strain M18 (GM18), strain M21 (GM21), *Geopsychrobacter electrodiphilus* (D888DRAFT), *Anaeromyxobacter* sp. FW109-5 (Anae109), *A. dehalogenans* (Adeh), *Desulfocapsa sulfexigens* (UWK), and *Desulfobacula toluolica* (TOL2).

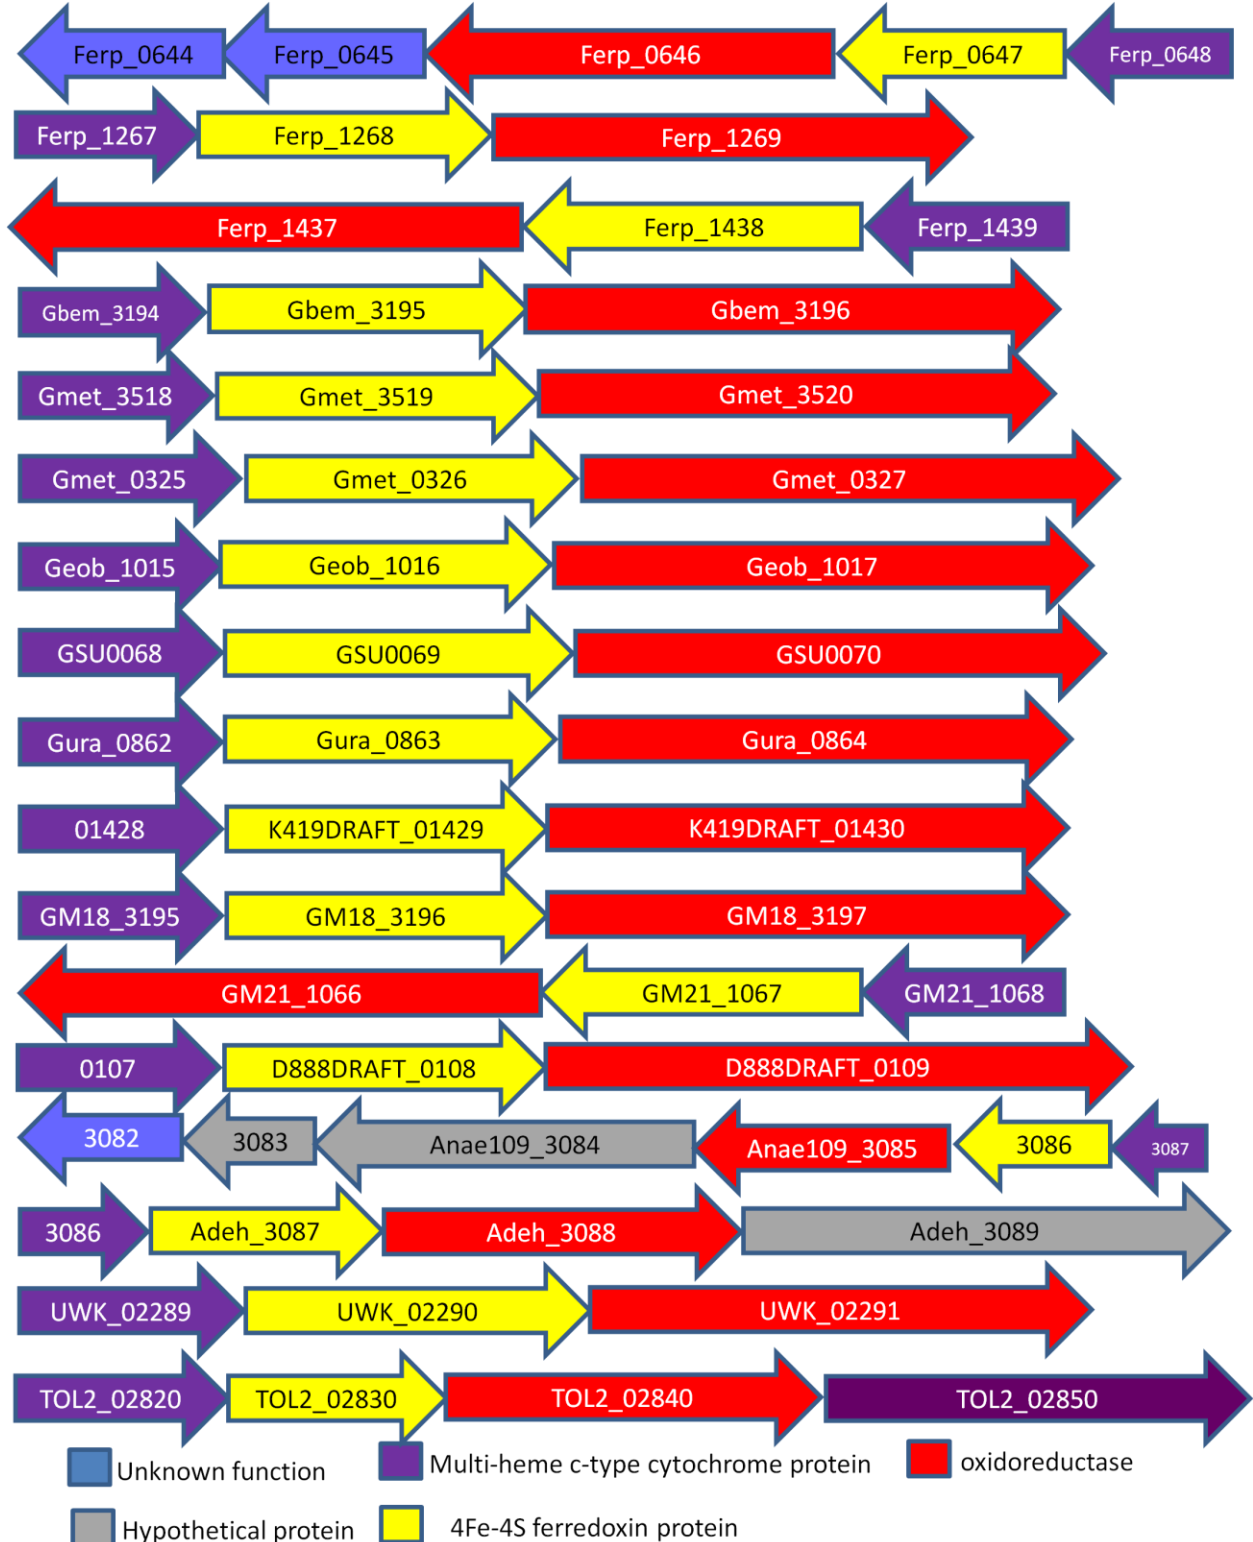

Table S1. Primers used to quantify different mRNA transcripts from *F. placidus* by quantitative RT-PCR.

| <b>Locus ID</b> | <b>Primer name</b>    | <b>Forward primer (5' → 3')</b> | <b>Reverse primer (5' → 3')</b> |
|-----------------|-----------------------|---------------------------------|---------------------------------|
| Ferp_0660       | Ferp_0660-241f/336r   | TTACACGGAGTCGACGTTTG            | CAGCTTGTAGTGGGGATCGT            |
| Ferp_0668       | Ferp_0668-451f/550r   | CACAGACCGTGGGTCTTTCA            | CGTGGGTGTGACAGCCTATG            |
| Ferp_0670       | Ferp_0670-2061f/2184r | CATCAGGTTCGGAAGGGACATA          | GGCATAGTGGGAGACCGTAGAG          |
| Ferp_0672       | Ferp_0672-4305f/4410r | CGCCGACAATCTTTCAATACTG          | CCCGTTTACTGCCCTGTTCTC           |
| Ferp_1255       | Ferp_1255-196f/313r   | GACGTTGGCAACAACACTACGA          | AGAGGACGTCTTTGGCGTAA            |
| Ferp_1267       | Ferp_1267-333f/434r   | ATTCTGCCTGAACTGCCACAA           | CAAACCGTACAAGGCTTATCCG          |
| Ferp_1336       | Ferp_1336-503f/613r   | CAAATACAAGCCGCCGAAA             | CGGATGCTTTACACCAGTTGG           |
| Ferp_1341       | Ferp_1341-510f/619r   | CGATTACAGTTTTGCGACGA            | CGAGGAAGACCGTGAAGAAG            |
| Ferp_1813       | Ferp_1813-185f/309r   | CGCCAACACCAAAACCTACT            | GTTACCGCAGAGCTGTCCTC            |
| Ferp_1814       | Ferp_1814-177f/256r   | CAACAATCCGAAGAGGCAAT            | GGCAGGAAATGCAGTAATCG            |
| Ferp_2064       | Ferp_2064-435f/537r   | ATGCCATAAACGGATTGAGACA          | GGCGAAGCACCAGAAGTTG             |

Table S2. Evaluation of *c*-type cytochromes present in the genomes of hyperthermophilic archaea.

| Hyperthermophilic archaeon       | Temperature range or optimum (°C) | Total putative <i>cyt c</i> genes | Genes with 1 heme-binding motif | Genes with 2-5 heme-binding motifs | Genes with 6-19 heme-binding motifs | Genes with 20+ heme-binding motifs | Electron acceptors utilized                                                                                                                                             |
|----------------------------------|-----------------------------------|-----------------------------------|---------------------------------|------------------------------------|-------------------------------------|------------------------------------|-------------------------------------------------------------------------------------------------------------------------------------------------------------------------|
| <i>Archaeoglobus fulgidus</i>    | 60-95                             | 6                                 | 3                               | 3                                  | -                                   | -                                  | Fe(III), SO <sub>4</sub> <sup>2-</sup> , SO <sub>3</sub> <sup>2-</sup> , S <sub>2</sub> O <sub>3</sub> <sup>2-</sup> (1-3)                                              |
| <i>Geoglobus acetivorans</i>     | 80                                | 16                                | 5                               |                                    | 1                                   | 1                                  | Fe(III) (4, 5)                                                                                                                                                          |
| <i>Caldivirga maquilingensis</i> | 85                                | 1                                 | 1                               | -                                  | -                                   | -                                  | SO <sub>4</sub> <sup>2-</sup> , SO <sub>3</sub> <sup>2-</sup> , S <sub>2</sub> O <sub>3</sub> <sup>2-</sup> , NO <sub>3</sub> <sup>-</sup> , Fe(III) (6)                |
| <i>Ferroglobus placidus</i>      | 85-90                             | 30                                | 5                               | 13                                 | 9                                   | 3                                  | Fe(III), S <sub>2</sub> O <sub>3</sub> <sup>2-</sup> , NO <sub>3</sub> <sup>-</sup> (7, 8)                                                                              |
| <i>Methanopyrus kandleri</i>     | 80-101                            | 2                                 | 2                               | -                                  | -                                   | -                                  | Fe(III), CO <sub>2</sub> (3, 9)                                                                                                                                         |
| <i>Pyrobaculum aerophilum</i>    | 100                               | 2                                 | 2                               | -                                  | -                                   | -                                  | O <sub>2</sub> , NO <sub>3</sub> <sup>-</sup> , NO <sub>2</sub> <sup>-</sup> , Fe(III) (10, 11)                                                                         |
| <i>Pyrobaculum islandicum</i>    | 95                                | 1                                 | 1                               | -                                  | -                                   | -                                  | SO <sub>4</sub> <sup>2-</sup> , SO <sub>3</sub> <sup>2-</sup> , S <sub>2</sub> O <sub>3</sub> <sup>2-</sup> , Fe(III), Mn(IV), U(VI), Tc(VII), Cr(VI), Co(III) (12, 13) |
| <i>Pyrobaculum</i> sp. 1860      | 84                                | 8                                 | 5                               | 1                                  | 2                                   | -                                  | NO <sub>3</sub> <sup>-</sup> , AsO <sub>4</sub> <sup>3-</sup> , S <sub>2</sub> O <sub>3</sub> <sup>2-</sup> , Fe(III) (14)                                              |
| <i>Pyrococcus abyssi</i>         | 96                                | 1                                 | 1                               | -                                  | -                                   | -                                  | fermentative, Fe(III) (3, 15)                                                                                                                                           |
| <i>Pyrococcus furiosus</i>       | 70-103                            | 0                                 | -                               | -                                  | -                                   | -                                  | fermentative, Fe(III) (3, 16, 17)                                                                                                                                       |

## References

1. **Beeder J, Nilsen RK, Rosnes JT, Torsvik T, Lien T.** 1994. *Archaeoglobus fulgidus* isolated from hot North-Sea-oil field waters. *Appl. Environ. Microbiol.* **60**:1227-1231.
2. **Klenk HP, Clayton RA, Tomb JF, White O, Nelson KE, Ketchum KA, Dodson RJ, Gwinn M, Hickey EK, Peterson JD, Richardson DL, Kerlavage AR, Graham DE, Kyrpides NC, Fleischmann RD, Quackenbush J, Lee NH, Sutton GG, Gill S, Kirkness EF, Dougherty BA, McKenney K, Adams MD, Loftus B, Peterson S, Reich CI, McNeil LK, Badger JH, Glodek A, Zhou LX, Overbeek R, Gocayne JD, Weidman JF, McDonald L, Utterback T, Cotton MD, Spriggs T, Artiach P, Kaine BP, Sykes SM, Sadow PW, DAndrea KP, Bowman C, Fujii C, Garland SA, Mason TM, Olsen GJ, Fraser CM, Smith HO, Woese CR, Venter JC.** 1997. The complete genome sequence of the hyperthermophilic, sulphate-reducing archaeon *Archaeoglobus fulgidus*. *Nature* **390**:364-&.
3. **Vargas M, Kashefi K, Blunt-Harris EL, Lovley DR.** 1998. Microbiological evidence for Fe(III) reduction on early Earth. *Nature* **395**:65-67.
4. **Mardanov AV, Slododkina GB, Slobodkin AI, Beletsky AV, Gavrillov SN, Kublanov IV, Bonch-Osmolovskaya EA, Skryabin KG, Ravin NV.** 2014. The genome of *Geoglobus acetivorans*: Fe(III) reduction, acetate utilization, autotrophic growth and degradation of aromatic compounds in a hyperthermophilic archaeon. *Appl. Environ. Microb.* doi: 10.1128/AEM.02705-14
5. **Slobodkina GB, Kolganova TV, Querellou J, Bonch-Osmolovskaya EA, Slobodkin AI.** 2009. *Geoglobus acetivorans* sp. nov., an iron(III)-reducing archaeon from a deep-sea hydrothermal vent. *Internat. J. Sys. Evol. Microbiol.* **59**:2880-2883.

6. **Itoh T, Suzuki K, Sanchez PC, Nakase T.** 1999. *Caldivirga maquilingensis* gen. nov., sp nov., a new genus of rod-shaped crenarchaeote isolated from a hot spring in the Philippines. Int. J. Syst. Bacteriol. **49**:1157-1163.
7. **Hafenbradl D, Keller M, Dirmeier R, Rachel R, Rossnagel P, Burggraf S, Huber H, Stetter KO.** 1996. *Ferroglobus placidus* gen nov, sp nov, a novel hyperthermophilic archaeum that oxidizes Fe<sup>2+</sup> at neutral pH under anoxic conditions. Arch. Microbiol. **166**:308-314.
8. **Tor JM, Kashefi K, Lovley DR.** 2001. Acetate oxidation coupled to Fe(III) reduction in hyperthermophilic microorganisms. Appl. Environ. Microb. **67**:1363-1365.
9. **Kurr M, Huber R, Konig H, Jannasch HW, Fricke H, Trincone A, Kristjansson JK, Stetter KO.** 1991. *Methanopyrus kandleri*, Gen and Sp-nov represents a novel group of hyperthermophilic methanogens, growing at 110-degrees-C. Arch. Microbiol. **156**:239-247.
10. **Volkl P, Huber R, Drobner E, Rachel R, Burggraf S, Trincone A, Stetter KO.** 1993. *Pyrobaculum aerophilum* sp-nov, a novel nitrate-reducing hyperthermophilic archaeum. Appl. Environ. Microb. **59**:2918-2926.
11. **Feinberg LF, Holden JF.** 2006. Characterization of dissimilatory Fe(III) versus NO<sub>3</sub>-reduction in the hyperthermophilic archaeon *Pyrobaculum aerophilum*. J. Bacteriol. **188**:525-531.
12. **Huber R, Kristjansson JK, Stetter KO.** 1987. *Pyrobaculum* gen-nov, a new genus of neutrophilic, rod-shaped *Archaeobacteria* from continental solfataras growing optimally at 100-Degrees-C. Arch. Microbiol. **149**:95-101.

13. **Kashefi K, Lovley DR.** 2000. Reduction of Fe(III), Mn(IV), and toxic metals at 100 degrees C by *Pyrobaculum islandicum*. Appl. Environ. Microb. **66**:1050-1056.
14. **Mardanov AV, Gumerov VM, Slobodkina GB, Beletsky AV, Bonch-Osmolovskaya EA, Ravin NV, Skryabina KG.** 2012. Complete genome sequence of strain 1860, a crenarchaeon of the genus *Pyrobaculum* able to grow with various electron acceptors. J. Bacteriol. **194**:727-728.
15. **Erauso G, Reysenbach AL, Godfroy A, Meunier JR, Crump B, Partensky F, Baross JA, Marteinson V, Barbier G, Pace NR, Prieur D.** 1993. *Pyrococcus abyssi* sp-nov, a new hyperthermophilic archaeon isolated from a deep-sea hydrothermal vent. Arch. Microbiol. **160**:338-349.
16. **Fiala G, Stetter KO.** 1986. *Pyrococcus furiosus* sp-nov represents a novel genus of marine heterotrophic Archaeobacteria growing optimally at 100-Degrees C. Arch. Microbiol. **145**:56-61.
17. **Robb FT, Maeder DL, Brown JR, DiRuggiero J, Stump MD, Yeh RK, Weiss RB, Dunn DM.** 2001. Genomic sequence of hyperthermophile, *Pyrococcus furiosus*: implications for physiology and enzymology. Methods Enzymol. **330**:134-157.
